# Supplementary material for: Noncanonical protease-activated receptor 1 regulates lymphatic differentiation in zebrafish
Source: PubMed Central journal article supplement — iScience. 2021 Oct 30;24(11):103386. doi: 10.1016/j.isci.2021.103386 (PMC8593614; doi:10.1016/j.isci.2021.103386), 2021-10-30
Supplement: mmc1.pdf [file mmc1.pdf]

**iScience, Volume 24**

**Supplemental information**

**Noncanonical protease-activated  
receptor 1 regulates lymphatic  
differentiation in zebrafish**

**Daoxi Lei, Xiuru Zhang, Muhammad Abdul Rouf, Yoga Mahendra, Lin Wen, Yan Li, Xiaojuan Zhang, Li Li, Luming Wang, Tao Zhang, Guixue Wang, and Yeqi Wang**

## Supplemental information

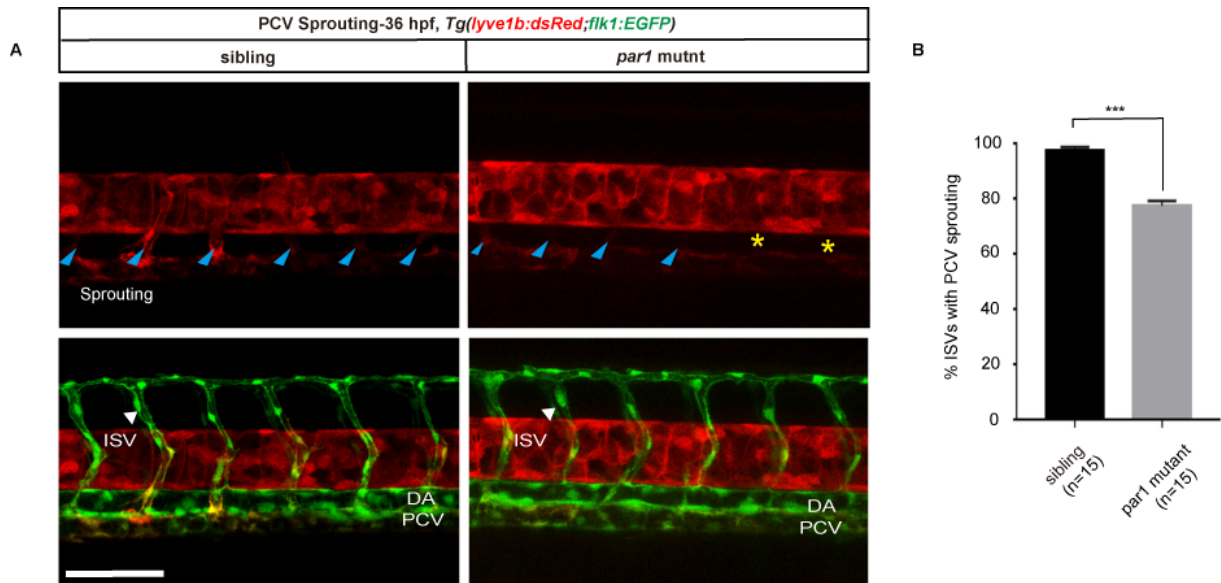

**Figure S1. *par1* mutants show defective lympho-venous sprouting in zebrafish embryos, related to Figure 1.**

(A) Confocal images showing lympho-venous sprouting in the posterior cardinal vein (PCV) area in sibling and *par1* mutants in *Tg(lyve1b:dsRed;flk1:EGFP)* line at 36 hpf. Blue arrowheads indicate lympho-venous sprouting from the PCV area in each intersegmental vessel (ISV); yellow asterisks represent a lack of lympho-venous sprouting from the PCV area in each ISV; the white arrowhead indicates the ISV, and the dorsal aorta (DA) and PCV areas are also noted. Scale bars: 100  $\mu$ m. (B) Percentage of lympho-venous sprouting from the PCV in sibling (n = 15 embryos) and *par1* mutants (n = 15 embryos); 8 ISVs/embryo were used for quantification. In (B), values represent means  $\pm$  SEMs. \* $P \leq 0.001$  in the Student's t-test.

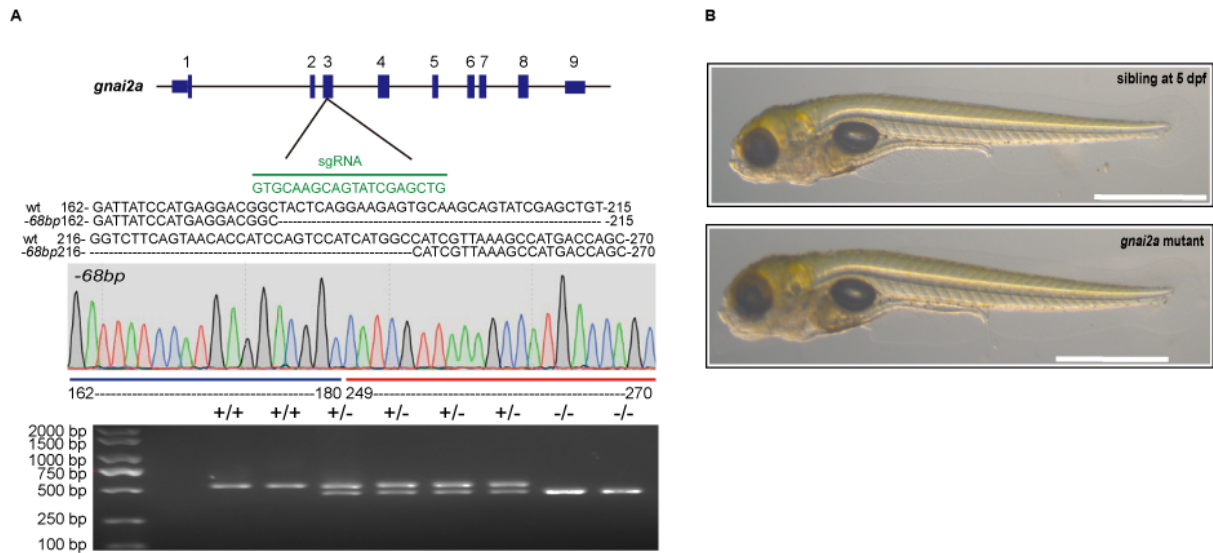

**Figure S2. Generation of *gnaï2a* zebrafish mutants, related to Figure 4.**

(A) Top, schematic representation of the generated *gnaï2a* zebrafish mutant (68 bp deletion in its exon 3); middle, results of sequencing for validating *gnaï2a* mutants; bottom, DNA gel results for genotyping wildtype (+/+), heterozygous (+/-), and homozygous mutant (-/-) embryos. (B) Brightfield lateral views of siblings and *gnaï2a* zebrafish mutants at 5 dpf. Scale bars: 1 mm.

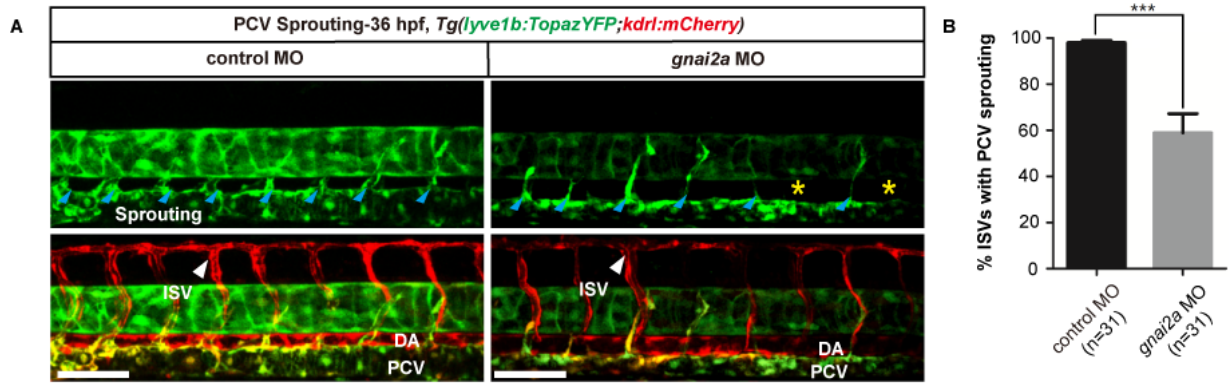

**Figure S3. Knockdown of *gnai2a* by *gnai2a* MO impaired lympho-venous sprouting in zebrafish embryos, related to Figure 4.**

(A) Confocal images showing lympho-venous sprouting in the PCV area in *Tg(lyve1b:TopazYFP;kdr1:mCherry)* injected with control MO and *gnai2a* MO at 36 hpf. Blue arrowheads indicate lympho-venous sprouting from the PCV area in each ISV; yellow asterisks represent the lack of lympho-venous sprouting from the PCV area in each ISV; the white arrowhead indicates the ISV, and DA and PCV areas are also noted. Scale bars: 100  $\mu$ m. (B) Percentage of lympho-venous sprouting from the PCV in embryos injected with control MO (n = 31 embryos) or 4 ng *gnai2a* MO (n = 31 embryos); 8 ISVs/embryo were used for quantification. In (B), values represent means  $\pm$  SEMs. \* $P \leq 0.001$  in the Student's t-test.

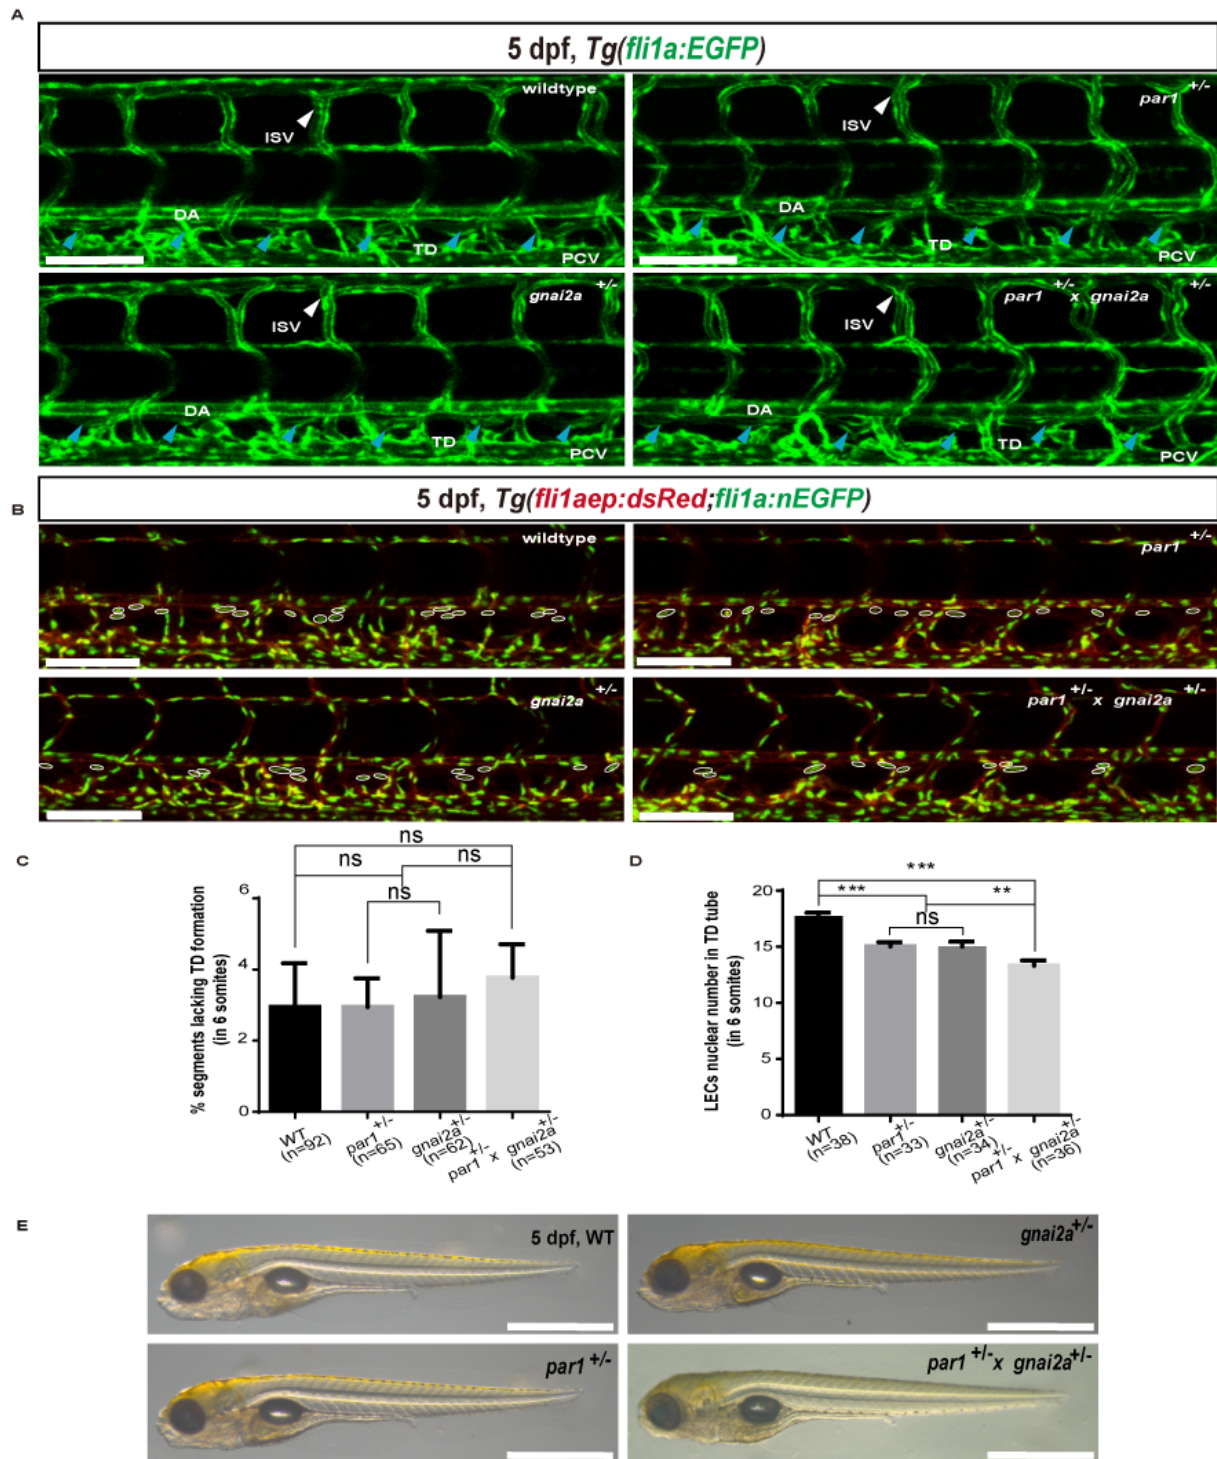

**Figure S4. Genetic interaction analyses between *par1*<sup>+/-</sup> and *gnai2a*<sup>+/-</sup> zebrafish mutants, related to Figure 4.**

(A) Confocal images showing TD formation of wildtype, *par1*<sup>+/-</sup> heterozygous mutants, *gnai2a*<sup>+/-</sup> heterozygous mutants, and *par1*<sup>+/-</sup> and *gnai2a*<sup>+/-</sup> double heterozygous mutants in the *Tg(fli1a:EGFP)* line at 5 dpf. Scale bars: 100  $\mu$ m. (B) Confocal images showing LECs nuclear numbers in the TD tube of wildtype, *par1*<sup>+/-</sup> heterozygous mutants, *gnai2a*<sup>+/-</sup> heterozygous mutants, and *par1*<sup>+/-</sup> and *gnai2a*<sup>+/-</sup> double heterozygous mutants in the *Tg(fli1a:EGFP)* and *Tg(fli1aep:dsRed);fli1a:nEGFP* lines at 5 dpf. White circles indicate the presence of LECs nuclear numbers in the TD tube. Scale bars: 100  $\mu$ m. (C) Percentage of somites lacking TD formation in wildtype (n = 92), *par1*<sup>+/-</sup> heterozygous mutants (n = 65), *gnai2a*<sup>+/-</sup> heterozygous mutants (n = 62), and *par1*<sup>+/-</sup> and *gnai2a*<sup>+/-</sup> double heterozygous mutants (n = 53) in the *Tg(fli1a:EGFP)* line at 5 dpf; 6 somites/embryo were used for quantification. (D) Quantification of LECs nuclear number in the TD tube of wildtype (n = 38), *par1*<sup>+/-</sup> heterozygous mutants (n = 33),

*gnai2a*<sup>+/-</sup> heterozygous mutants (n = 34), and *par1*<sup>+/-</sup> and *gnai2a*<sup>+/-</sup> double heterozygous mutants (n = 36) in the *Tg(fli1aep:dsRed;fli1a:nEGFP)* line at 5 dpf; 6 segments/embryo were used for quantification. (E) Brightfield lateral views of morphology of wildtype, *par1*<sup>+/-</sup> heterozygous mutants, *gnai2a*<sup>+/-</sup> heterozygous mutants, and *par1*<sup>+/-</sup> and *gnai2a*<sup>+/-</sup> double heterozygous mutants at 5 dpf. Scale bars: 1 mm. In (C) and (D), values represent means  $\pm$  SEMs. \**P*  $\leq$  0.01, \*\**P*  $\leq$  0.001, ns, not significant in the Student's t-test.



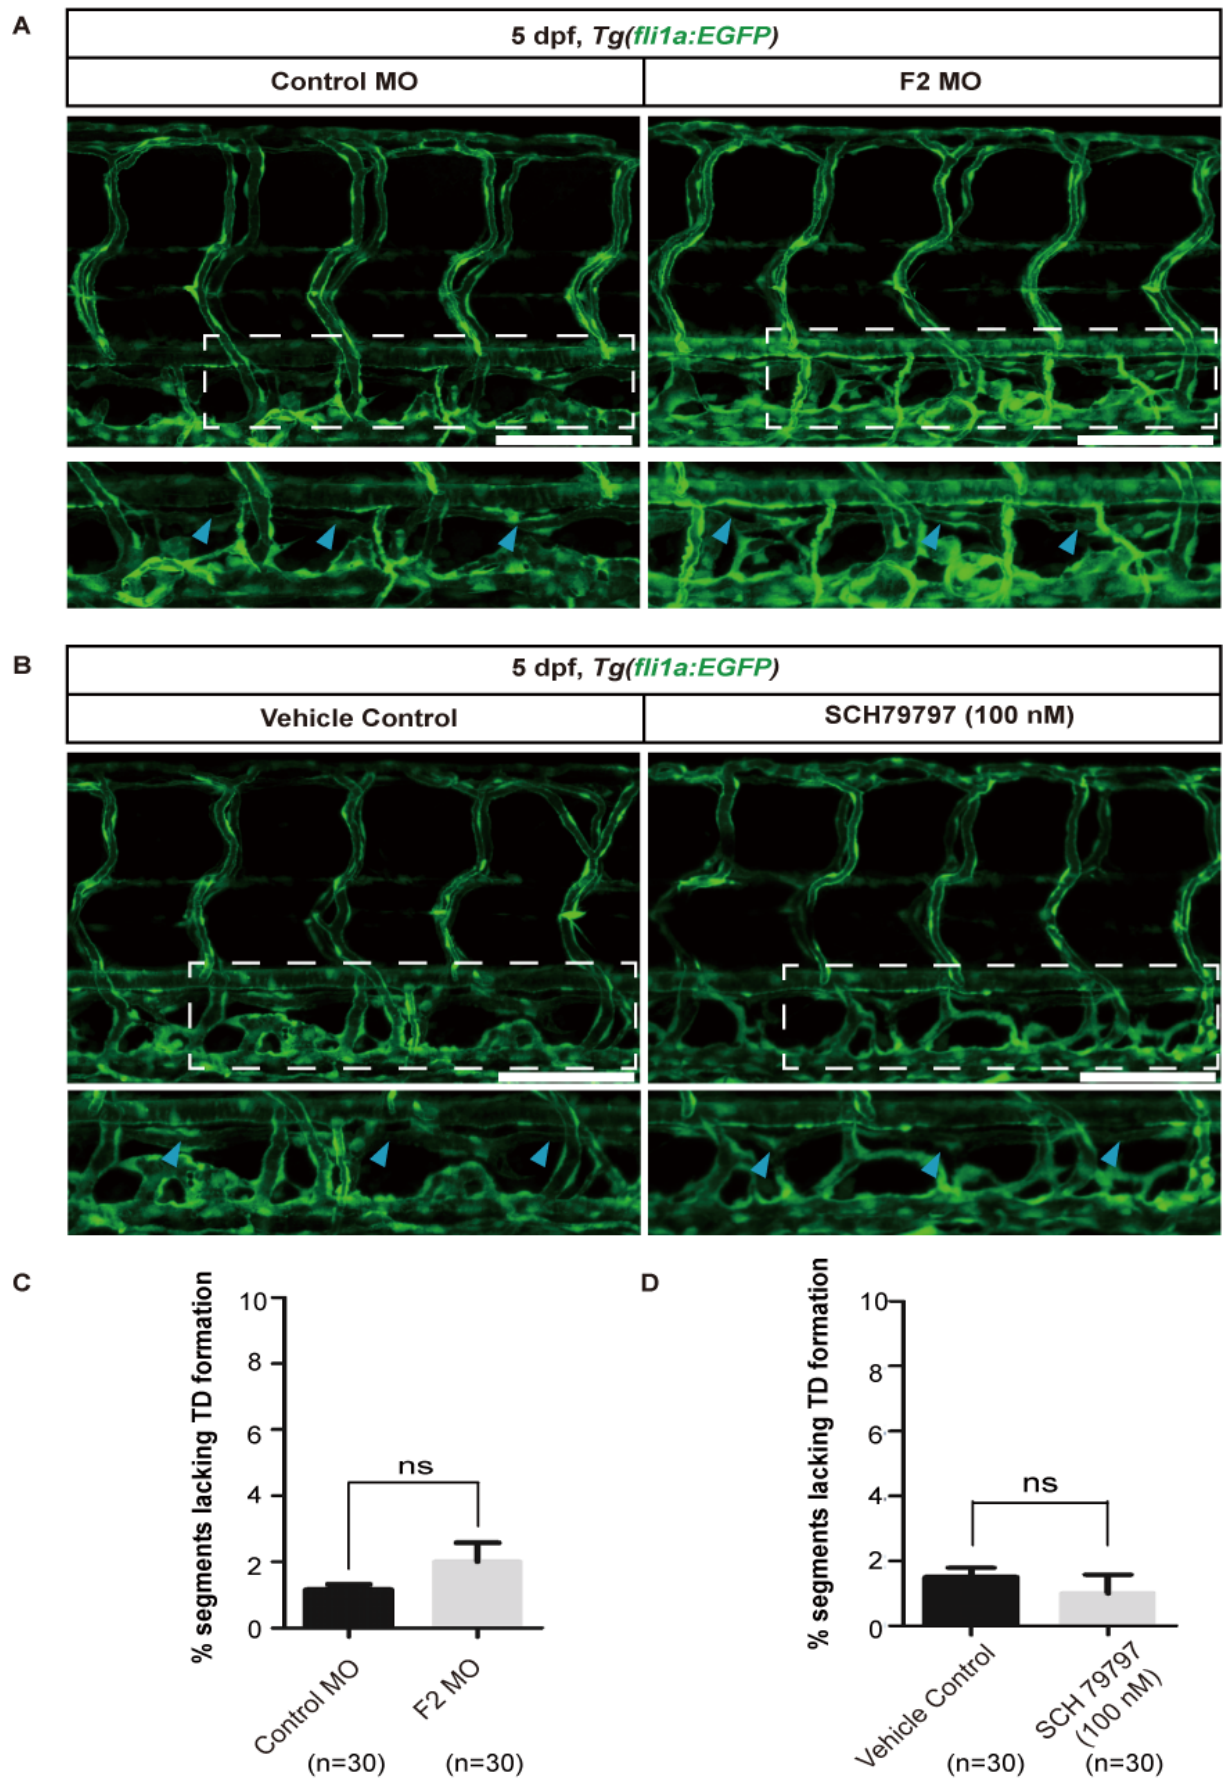

Figure S5. Classic Par1 ligand thrombin (F2) is not required for zebrafish lymphatic

**development, related to Figure 5.**

(A) Confocal images showing TD formation after injecting *Tg(fli1a:EGFP)* with 4 ng control MO and 4 ng F2 MO at 5 dpf. Blue arrowheads indicate TD formation in each somite. Scale bars: 100  $\mu$ m. (B) Confocal images showing TD formation of the vehicle control group and SCH79797-treated group at 5 dpf. Blue arrowheads indicate TD formation in each somite. Scale bars: 100  $\mu$ m. (C) Percentage of somites lacking TD formation in control embryos (n = 30 embryos) or F2 morphants (n = 30 embryos); 6 somites/embryo were used for quantification. (D) Percentage of somites lacking TD formation in embryos treated with vehicle control (n = 30 embryos) or 100 nM SCH79797 (n = 30 embryos); 6 somites/embryo were used for quantification. In (C) and (D), values represent means  $\pm$  SEMs. ns, not significant in the Student's t-test.



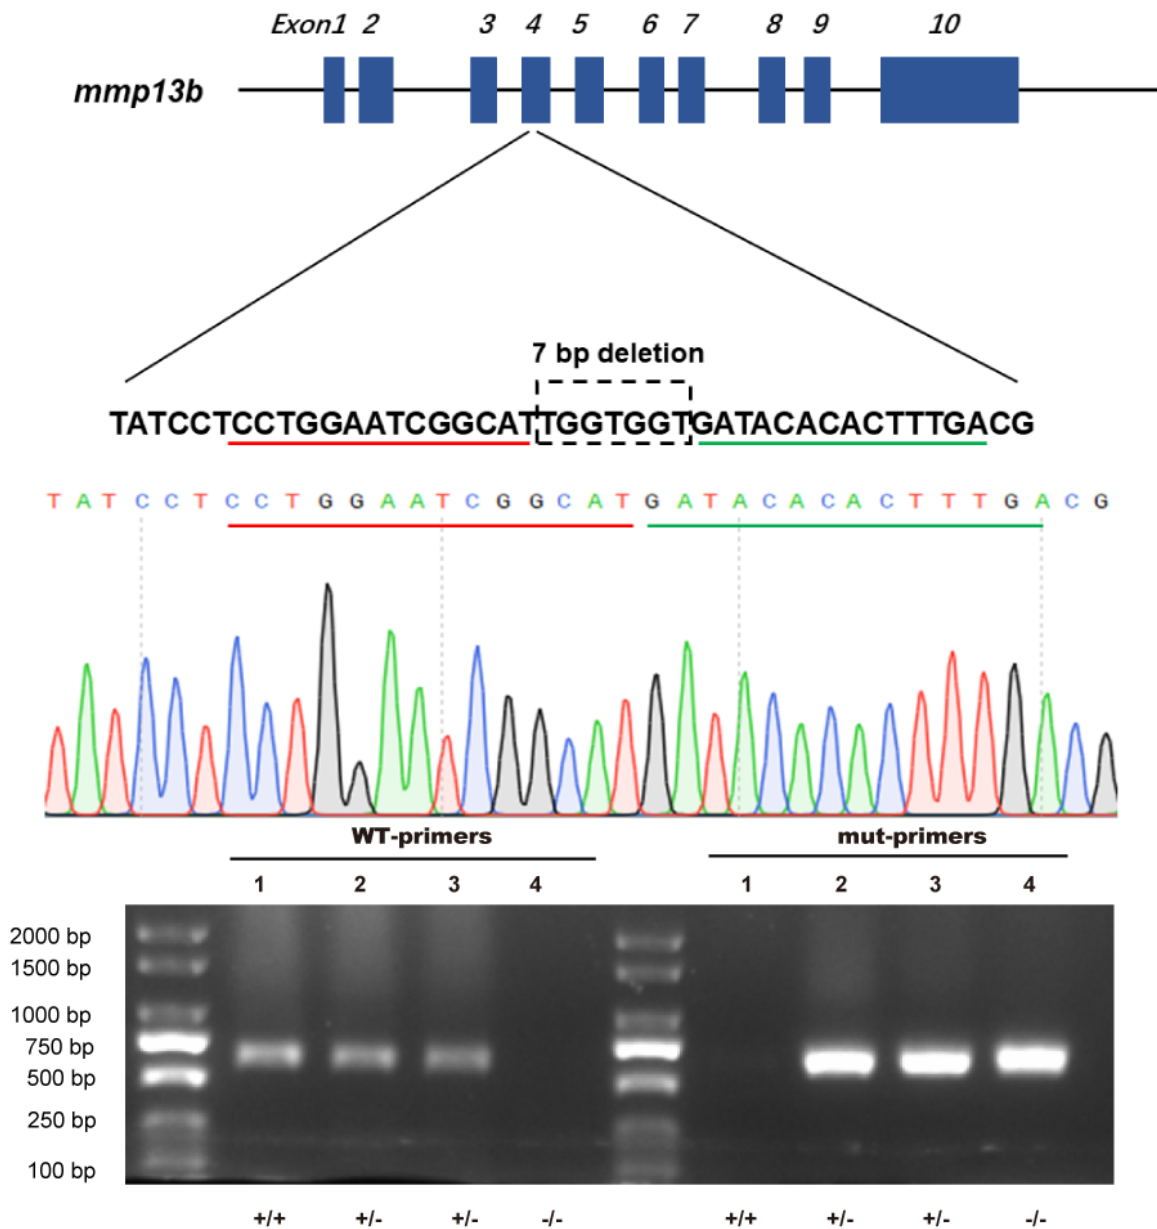

**Figure S6. Generation of *mmp13b* zebrafish mutant, related to Figure 5.**

Top, schematic representation of the generated *mmp13b* zebrafish mutant (7 bp deletion in its exon 4); middle, results of sequencing for validating *mmp13b* mutants; bottom, DNA gel results for genotyping wildtype (+/+), heterozygous (+/-), and homozygous mutant (-/-) embryos.

**Table S1. Sequence information in this study, related to STAR Methods.**

| Gene                         | Purpose                       | Sequence                                                                                                                                      |
|------------------------------|-------------------------------|-----------------------------------------------------------------------------------------------------------------------------------------------|
| <i>par1</i><br>(zebrafish)   | Primers for mutant genotyping | F: 5'-GAGCCGTTTGATTATCTGGACG-3'<br>R: 5'-CGGCTCCGTATATCCAGTTG-3'                                                                              |
|                              | Probe for WISH                | F: 5'-TTCTGTGCTGCTGATTATGT-3'<br>R: 5'-CTTGTGCTGGAGGTGAAC-3'                                                                                  |
| <i>gnai2a</i><br>(zebrafish) | Primers for mutant genotyping | F: 5'-ATGCACGCCGCTAAATATTTTCATA-3'<br>R: 5'-AGGCTGTGGTTTTTCCAATTTCAG-3'                                                                       |
|                              | Probe for WISH                | F: 5'-GTCTTCAGTAACACCATCCA-3'<br>R: 5'-CCTCATCCTCAGCCAGTA-3'                                                                                  |
| <i>gnai2b</i><br>(zebrafish) | Primers for WISH              | F: 5'-GAGCCGTGGTTTACAGCAAC-3'<br>R: 5'-CCTGCTGGGTGGGAATGTAG-3'                                                                                |
| <i>mmp13b</i><br>(zebrafish) | Primers for mutant genotyping | WT-F: 5'-CGGCATTGGTGGTGATACAC-3'<br>R: 5'-TGTGGTGTATGAGGACATGTGTTA-3'<br>MU-F: 5'-AATCGGCATGATACACACT-3'<br>R: 5'-TGTGGTGTATGAGGACATGTGTTA-3' |
|                              | Probe for WISH                | F: 5'-CGACATTGAGGGCATCCAGT-3'<br>R: 5'-GAACGACTTTCCTTGCGCTG-3'                                                                                |
| <i>flt4</i><br>(zebrafish)   | Probe for WISH                | F: 5'-AGTCAAGTGCACGGATGAT-3'<br>R: 5'-ACCATCCACTGTCTGTCTG-3'                                                                                  |
| <i>PAR1</i><br>(human)       | Primers for qPCR              | F: 5'-CCAGTGAGGACAGATGCAGA-3'<br>R: 5'-GCAGTGGCACCATCCAA-3'                                                                                   |
| <i>GNA11</i><br>(human)      | Primers for qPCR              | F: 5'-GTCTACCAGAACATCTTCACCG-3'<br>R: 5'-GTAAGTATGCTCGAAGGTGG-3'                                                                              |
| <i>GNAQ</i><br>(human)       | Primers for qPCR              | F: 5'-ATCAGAACATCTTCACGGCC-3'<br>R: 5'-AAAGCAGACACCTTCTCCAC-3'                                                                                |
| <i>GNA13</i><br>(human)      | Primers for qPCR              | F: 5'-GTCGAGAATTTCAACTGGGTG-3'<br>R: 5'-CAAAGTCGTATTCATGGATGCC-3'                                                                             |
| <i>GNA12</i><br>(human)      | Primers for qPCR              | F: 5'-AAGTCCACGTTTCTCAAGC-3'<br>R: 5'-CCAAGGAATGCCAAGCTTATC-3'                                                                                |
| <i>GNAI2</i><br>(human)      | Primers for qPCR              | F: 5'-ATGGAAGTGGATGGTGTGCT-3'<br>R: 5'-GGAGGTGAAGTTGCTGCTGT-3'                                                                                |
| <i>GNAI1</i><br>(human)      | Primers for qPCR              | F: 5'-TCTGAATAACCAGCTTCATGGAT-3'<br>R: 5'-GGAGCGGAGTAAGATGATCG-3'                                                                             |
| <i>GNAI3</i><br>(human)      | Primers for qPCR              | F: 5'-CATCCTCTGAATAGCCATCCTC-3'<br>R: 5'-AAGATGATCGACCGCAACTT-3'                                                                              |
| <i>MMP1</i><br>(human)       | Primers for qPCR              | F: 5'-GCACAAATCCCTTCTACCCG-3'<br>R: 5'-TGAACAGCCCAGTACTTATTCC-3'                                                                              |
| <i>MMP13</i><br>(human)      | Primers for qPCR              | F: 5'-GATGACGATGTACAAGGGATCC-3'<br>R: 5'-ACTGGTAATGGCATCAAGGG-3'                                                                              |
| <i>APC</i><br>(human)        | Primers for qPCR              | F: 5'-ACGACAGCTTTTACAGTCCC-3'<br>R: 5'-TTGAACCCTGACCATTACCAG-3'                                                                               |
| <i>F2</i><br>(human)         | Primers for qPCR              | F: 5'-ATGTCTGGAAGGTAAGTGTGC-3'<br>R: 5'-CAGGATGGGTAGTGGAGTTG-3'                                                                               |
| <i>GZMA</i><br>(human)       | Primers for qPCR              | F: 5'-AACTCCTATAGATTTCTGGCATCC-3'<br>R: 5'-CCATGTAGGGTCTTGAATGAGG-3'                                                                          |
| <i>PLG</i><br>(human)        | Primers for qPCR              | F: 5'-GAAGACCCAGAAAACCTACCC-3'<br>R: 5'-TTTCAGGTTGCAGTACTCCC-3'                                                                               |

---

*PROX1*  
(human)

Primers for qPCR

F: 5'-GGCATTGAAAACTCCCGTA-3'  
R: 5'-ACAGGGCTCTGAACATGCAC-3'

---
